# Supplementary material
Source: PubMed Central journal article supplement (PMC3286286)
Supplement: supp_mcr321_mcr321supp.pdf [file supp_mcr321_mcr321supp.pdf]

FIG. S1. Comparison of the NTα-Gal amino acid sequence with the sequences of six other plant α-Gals. Amino acids, which are completely conserved, are marked with asterisks, and the highly conserved amino acids are marked with dots or double dots; gaps left to improve the alignment are indicated with -. Numbers refer to amino acid residues at the end of the respective lines. Species' names are abbreviated at the left and are represented with accession numbers and percent conservation values: LEαGal = *Lycopersicon esculentum*, Q9SP05, 83%; CAαGal = *Coffea arabica*, Q5DUH8, 82%; VVaGal = *Vitis vinifera*, D7TXW5, 73%; OSαGal = *Oryza sativa*, Q9FXT4; PSαGal = *Picea sitchensis*, D5ADT9, 68%; ATαGal = *Arabidopsis thaliana*, O8RX86, 73%.

[illegible]
